# Supplementary material for: The metalloproteases ADAM17 and ADAM10 regulate endothelial migration and proliferation induced by the mechanoresponsive ion channels Piezo1 and TRPV4
Source: Research Square preprint supplement (doi:10.21203/rs.3.rs-6751688/v1), 2025-05-29
Supplement: Supplementary file 1 [file eba64931400b90df96859992.docx]

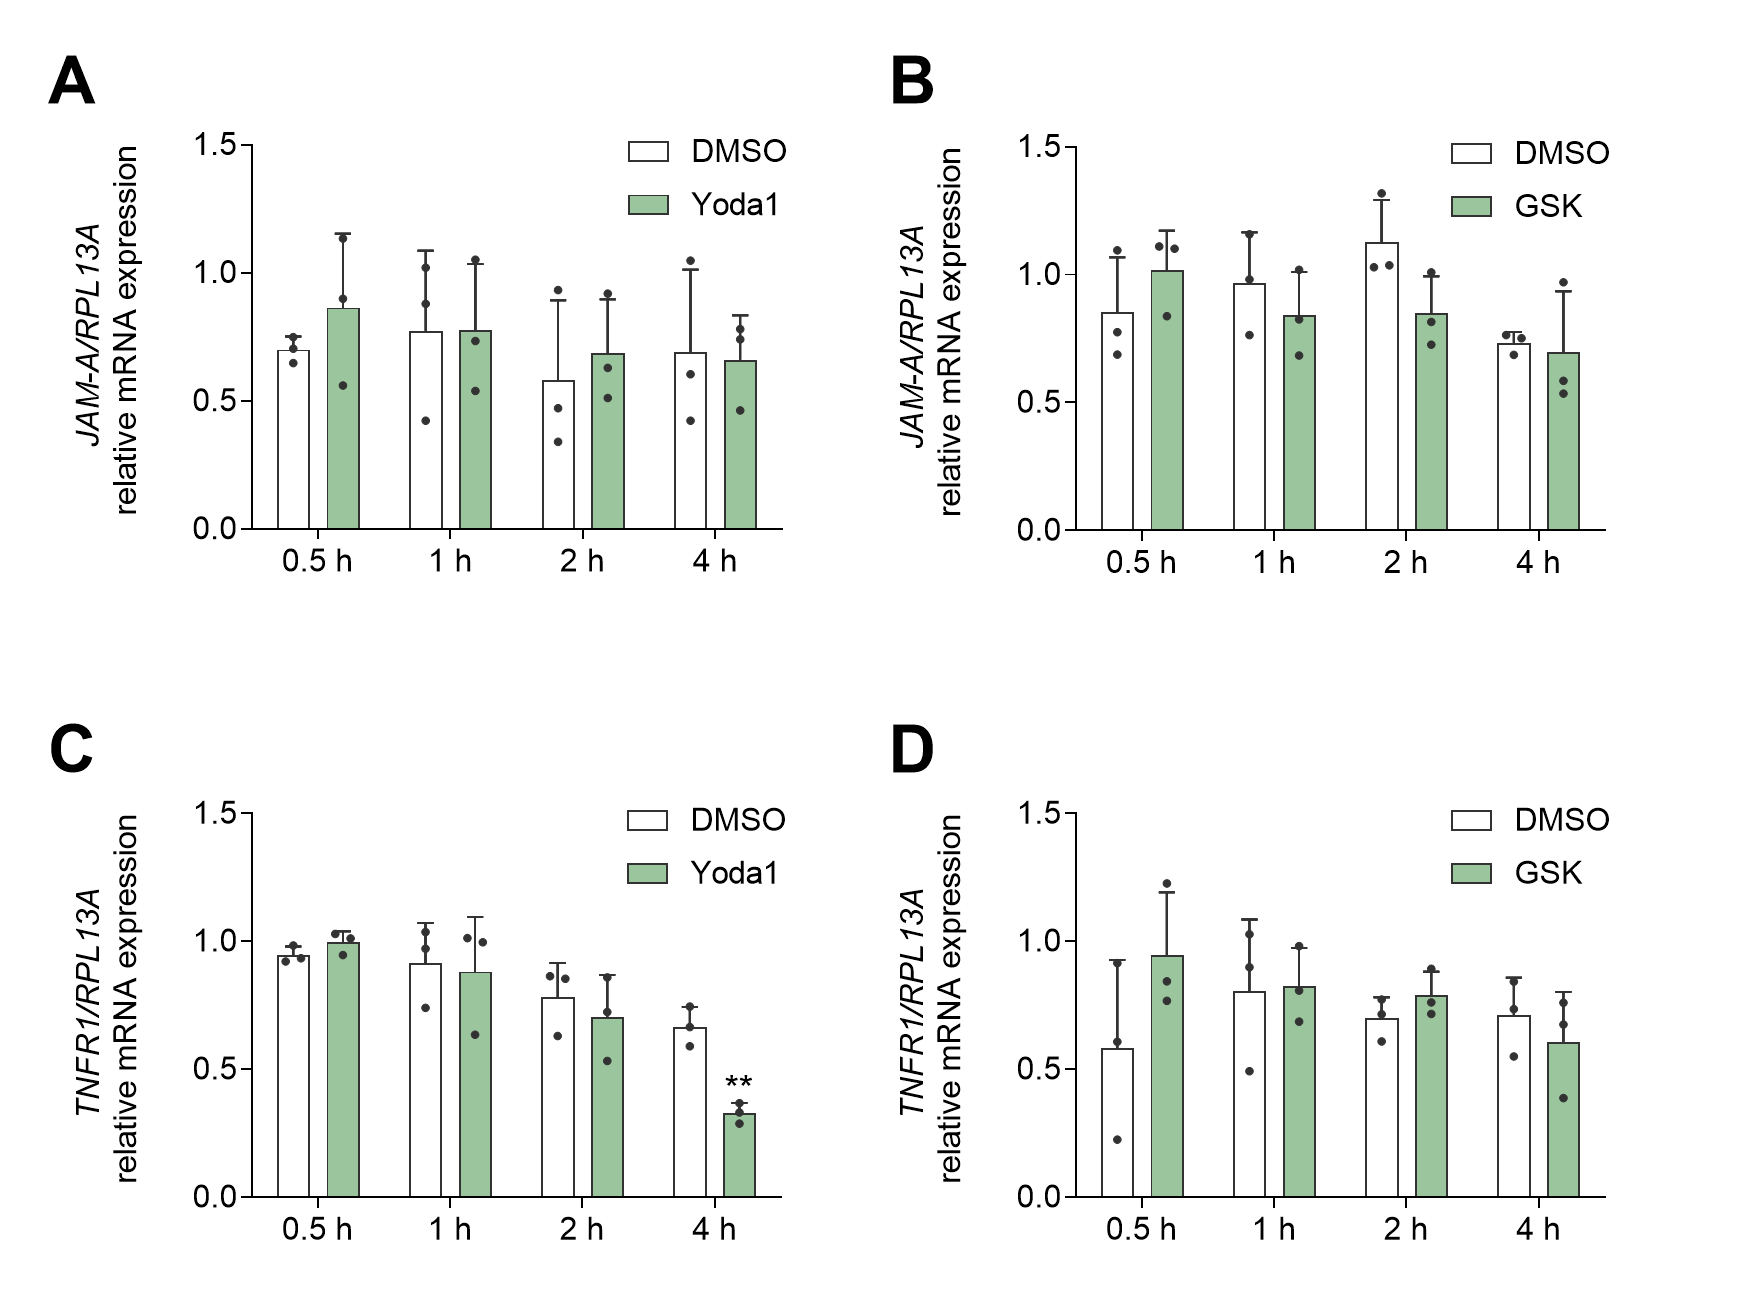


**Suppl. Fig. 1: Piezo1-mediates no change on the transcriptional level of *JAM-A* and *TNFR1.***

HUVECs were treated with 1 µM Yoda1 or 0.6 nM GSK for 0.5, 1, 2, or 4 h. *JAM-A* **A, B**and *TNFR1* **C, D** mRNA expression was measured in relation to the expression of the reference gene *RPL13A* in the cell lysates. Quantitative data are shown as mean + SD of at least three independent experiments. Statistical differences to the control are indicated by asterisks (* p≤0.05, ** p≤0.01, *** p≤0.001), while differences between the treatments are indicated by hashes (# p≤0.05, ## p≤0.01, ### p≤0.001).


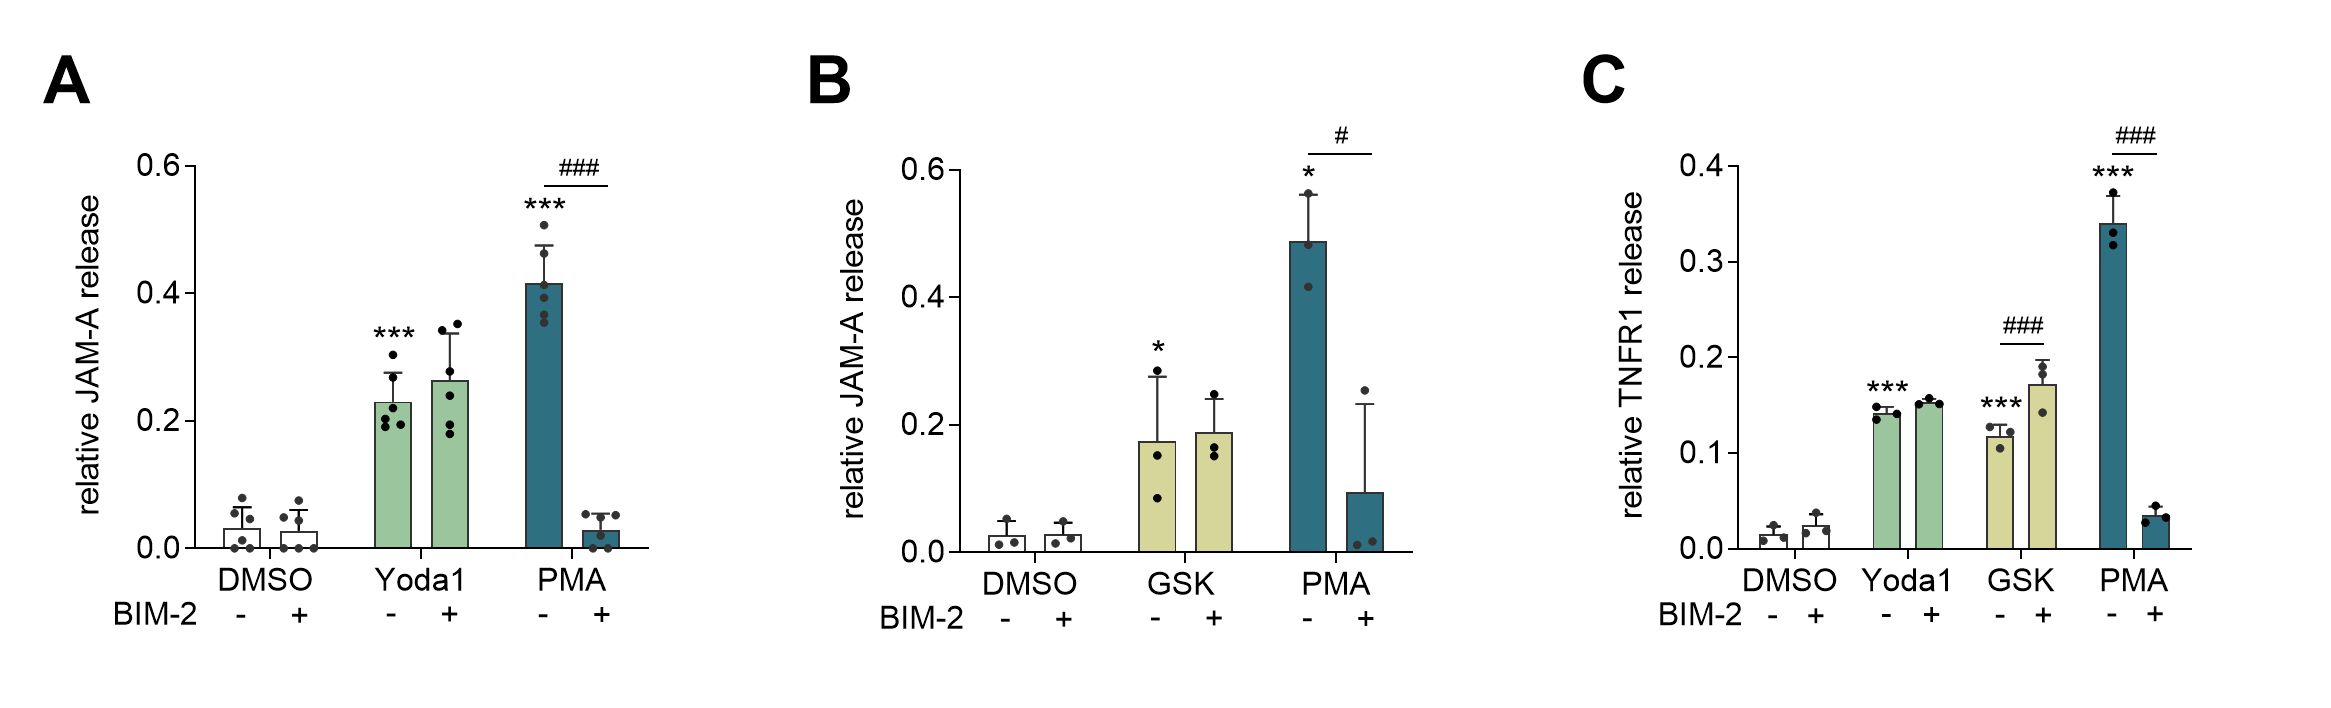


**Suppl. Fig. 2: Piezo1- and TRPV4-mediated ADAM activation is independent of PKC signaling.**

HUVECs were pre-incubated with BIM-2 (1 µM), followed by addition of Yoda1 (1 µM) **A, C** or GSK (0.6 nM) **B, C** and further incubation for 4 h. Concentrations of soluble JAM-A **A** and **B**, or TNFR1 **C**, were determined via ELISA. Quantitative data are shown as mean + SD of at least three independent experiments. Statistical differences to the control are indicated by asterisks (* p≤0.05, ** p≤0.01, *** p≤0.001), while differences between the treatments are indicated by hashes (# p≤0.05, ## p≤0.01, ### p≤0.001).

| **Figure 1: Flow-induced ADAM activation involves Piezo1 and TRPV4** | | | | | |
| --- | --- | --- | --- | --- | --- |
| **A** | | | **B** | | |
| 0 dyne/cm2 | DMSO | 39.65 ± 8.67 | 0 dyne/cm2 | DMSO | 5.84 ± 3.67 |
| 0 dyne/cm2 | GW | 33.44 ± 10.58 | 0 dyne/cm2 | GW | 3.52 ± 4.4 |
| 15 dyne/cm2 | DMSO | 177.30 ± 30.83 | 15 dyne/cm2 | DMSO | 47.52 ± 6.73 |
| 15 dyne/cm2 | GW | 49.06 ± 14.56 | 15 dyne/cm2 | GW | 12.54 ± 7.42 |
| **C** | | | **E** | | |
| 0 dyne/cm2 | DMSO | 129.91 ± 73.07 | 0 dyne/cm2 | shControl | 109.94 ± 59.39 |
| 0 dyne/cm2 | SalB | 150.04 ± 57.17 | 0 dyne/cm2 | sh*PIEZO1* | 212.62 ± 89.19 |
| 15 dyne/cm2 | DMSO | 289.6 ± 26.02 | 15 dyne/cm2 | shControl | 501.51 ± 392.54 |
| 15 dyne/cm2 | SalB | 207.99 ± 61.86 | 15 dyne/cm2 | sh*PIEZO1* | 629.68 ± 497.62 |
| **F** | | | **G** | | |
| 0 dyne/cm2 | DMSO | 110.75 ± 65.86 | 0 dyne/cm2 | DMSO | 131.05 ± 47.37 |
| 0 dyne/cm2 | HC | 108.73 ± 60.63 | 0 dyne/cm2 | GsMTx4 | 126.63 ± 57.67 |
| 15 dyne/cm2 | DMSO | 322.87 ± 90.37 | 15 dyne/cm2 | DMSO | 746.99 ± 121.43 |
| 15 dyne/cm2 | HC | 224.29 ± 52.99 | 15 dyne/cm2 | GsMTx4 | 449.79 ± 127.21 |

**Supp. table 1:** ELISA mean raw values of Figure 1 in pg/ml.

| **Figure 2: Release of ADAM10- & ADAM17-specific substrates is induced by chemical activation of Piezo1 and TRPV4** | | | | | |
| --- | --- | --- | --- | --- | --- |
| **C** | | | **D** | | |
| 0.5 h | DMSO | 13.17 ± 9.75 | 0.5 h | DMSO | 50.59 ± 1 |
| 0.5 h | Yoda1 | 12.12 ± 4.3 | 0.5 h | GSK | 66.78 ± 6.48 |
| 0.5 h | PMA | 31.16 ± 11.26 | 0.5 h | PMA | 81.48 ± 3.97 |
| 1 h | DMSO | 12.63 ± 7.78 | 1 h | DMSO | 55.78 ± 3.17 |
| 1 h | Yoda1 | 25.36 ± 12.97 | 1 h | GSK | 132.92 ± 22.07 |
| 1 h | PMA | 88.22 ± 40.45 | 1 h | PMA | 190.12 ± 24.13 |
| 2 h | DMSO | 8.9 ± 6.49 | 2 h | DMSO | 60,42 ± 3.63 |
| 2 h | Yoda1 | 49.13 ± 14.03 | 2 h | GSK | 717.28 ± 38.27 |
| 2 h | PMA | 174.58 ± 80.39 | 2 h | PMA | 300.3 ± 70.77 |
| 4 h | DMSO | 8.81 ± 7.3 | 4 h | DMSO | 65.87 ± 0.15 |
| 4 h | Yoda1 | 199.99 ± 25.94 | 4 h | GSK | 772 ± 84.21 |
| 4 h | PMA | 264.13 ± 24.27 | 4 h | PMA | 256.87 ± 86.01 |
| **E** | | | F | | |
| 0.5 h | DMSO | 9.49 ± 0.42 | 0.5 h | DMSO | 9.5 ± 0.42 |
| 0.5 h | Yoda1 | 26.81 ± 1.82 | 0.5 h | GSK | 22.71 ± 2.77 |
| 0.5 h | PMA | 28 ± 2.48 | 0.5 h | PMA | 28 ± 2.48 |
| 1 h | DMSO | 11.5 ± 0.814 | 1 h | DMSO | 11.5 ± 0.27 |
| 1 h | Yoda1 | 33.06 ± 0.77 | 1 h | GSK | 25.63 ± 3.46 |
| 1 h | PMA | 37.48 ± 3.8 | 1 h | PMA | 37.48 ± 3.8 |
| 2 h | DMSO | 13.34 ± 0.81 | 2 h | DMSO | 13.34 ± 0.81 |
| 2 h | Yoda1 | 35.69 ± 5.7 | 2 h | GSK | 36.25 ± 6.75 |
| 2 h | PMA | 56.3 ± 9.15 | 2 h | PMA | 56.3 ± 9.15 |
| 4 h | DMSO | 19.07 ± 0.5 | 4 h | DMSO | 19.07 ± 0.5 |
| 4 h | Yoda1 | 37.2 ± 1.12 | 4 h | GSK | 26.19 ± 2.45 |
| 4 h | PMA | 43.81 ± 17.09 | 4 h | PMA | 43.81 ± 17.09 |

**Suppl. table 2:** ELISA mean raw values of Figure 2 in pg/ml.

| **Figure 3: Ion channel-mediated JAM-A and TNFR1 release is specific for the corresponding mechanoresponsive ion channel and ADAM protease** | | | | | |
| --- | --- | --- | --- | --- | --- |
| **A** | | | **B** | | |
| DMSO | DMSO | 41.44 ± 6.31 | DMSO | DMSO | 46.88 ± 8.91 |
| DMSO | GI | 13.21 ± 2.38 | DMSO | GI | 27.48 ± 5.7 |
| DMSO | GW | 4.53 ± 2.61 | DMSO | GW | 17.01 ± 1.56 |
| Yoda1 | DMSO | 241.89 ± 53.63 | GSK | DMSO | 434.07 ± 187.1 |
| Yoda1 | GI | 107.71 ± 53.63 | GSK | GI | 251.56 ± 110.86 |
| Yoda1 | GW | 16.58 ± 8.18 | GSK | GW | 22.44 ± 6.6 |
| **C** | | | **D** | | |
| DMSO | DMSO | 10.56 ± 4.91 | DMSO | DMSO | 15.09 ± 4.4 |
| DMSO | GI | 3.09 ± 3.1 | DMSO | GI | 13.92 ± 5.7 |
| DMSO | GW | 0.84 ± 1.19 | DMSO | GW | 7.99 ± 6.66 |
| Yoda1 | DMSO | 40.79 ± 6.09 | GSK | DMSO | 28.19 ± 7.84 |
| Yoda1 | GI | 40.61 ± 4.2 | GSK | GI | 23.25 ± 4.68 |
| Yoda1 | GW | 1.19 ± 1.68 | GSK | GW | 9.51 ± 6.54 |
| **E** | | | **E** | | |
| DMSO | DMSO | 21.15 ± 5.84 | DMSO | DMSO | 15.09 ± 4.4 |
| DMSO | SalB | 21.33 ± 4.44 | DMSO | HC | 16.59 ± 5.9 |
| Yoda1 | DMSO | 100.71 ± 24.12 | Yoda1 | DMSO | 28.19 ± 7.84 |
| Yoda1 | SalB | 37.33 ± 17.15 | Yoda1 | HC | 12.95 ± 4.88 |
| **F** | | | **G** | | |
| DMSO | control | 55.42 ± 36.1 | DMSO | control | 11.26 ± 0.98 |
| DMSO | *PIEZO1* | 65.56 ± 44.15 | DMSO | *TRPV4* | 10.76 ± 0.19 |
| Yoda1 | control | 490.66 ± 113.57 | Yoda1 | control | 226.24 ± 98.14 |
| Yoda1 | *PIEZO1* | 160.65 ± 30.76 | Yoda1 | *TRPV4* | 68.5 ± 62.67 |
| PMA | control | 960.07 ± 248.18 | PMA | control | 290.38 ± 49.06 |
| PMA | *PIEZO1* | 1065.04 ± 217.07 | PMA | *TRPV4* | 267.32 ± 45.66 |
| **H** | | | **J** | | |
| DMSO | DMSO | 42.28 ± 17.7 | DMSO | DMSO | 46.88 ± 8.91 |
| DMSO | HC | 38.73 ± 21.31 | DMSO | SalB | 44.22 ± 11.91 |
| Yoda1 | DMSO | 267.75 ± 80.94 | GSK | DMSO | 434.07 ± 187.1 |
| Yoda1 | HC | 280.24 ± 65.08 | GSK | SalB | 516 ± 254.13 |

**Suppl. table 3:** ELISA mean raw values of Figure 3 in pg/ml.

| **Suppl. Figure 2: Piezo1- and TRPV4-mediated ADAM activation is independent of PKC signaling** | | | | | |
| --- | --- | --- | --- | --- | --- |
| **A** | | | **B** | | |
| DMSO | DMSO | 14.45 ± 12.09 | DMSO | DMSO | 39.34 ± 28.81 |
| DMSO | BIM-2 | 12.12 ± 13.23 | DMSO | BIM-2 | 41.67 ± 24.13 |
| Yoda1 | DMSO | 104.13 ± 59.85 | GSK | DMSO | 260.1 ± 150.91 |
| Yoda1 | BIM-2 | 122.63 ± 82.7 | GSK | BIM-2 | 270.59 ± 97.18 |
| PMA | DMSO | 180.07 ± 83.92 | PMA | DMSO | 680.33 ± 131.59 |
| PMA | BIM-2 | 12.3 ± 12.47 | PMA | BIM-2 | 107.05 ± 119.62 |
| **C** | | |  | | |
| DMSO | DMSO | 4.05 ± 2.19 |  |  |  |
| DMSO | BIM-2 | 6.51 ± 3.1 |  |  |  |
| Yoda1 | DMSO | 36.52 ± 3.63 |  |  |  |
| Yoda1 | BIM-2 | 39.59 ± 4.21 |  |  |  |
| GSK | DMSO | 30.36 ± 2.76 |  |  |  |
| GSK | BIM-2 | 44.83 ± 9.33 |  |  |  |
| PMA | DMSO | 87.23 ± 5.22 |  |  |  |
| PMA | BIM-2 | 8.92 ± 1.18 |  |  |  |

**Suppl. table 4:** ELISA mean raw values of Suppl. Fig. 2 in pg/ml.

| **Target** | **Sequence (5'-3')** | **Temperature (°C)** |
| --- | --- | --- |
| hRPL13A_for | GCC CTA CGA CAA GAA AAG CG | 60 |
| hRPL13A_rev | TAC TTC CAG CCA ACC TCG TGA |
| hJAM-A_for | TGA CAG AAC AAA GAA AGG GAC | 60 |
| hJAM-A_rev | GTG AAA CTA CAG ACA TCA GGG |
| hHEY1_for | CCCAACTACATCTTCCCA | 59 |
| hHEY1_rev | GTCAAAGTAACCTTTCCCTC |
| hTNFR1_for | CAG TTC CAC CTT CAC CTC | 59 |
| hTNFR1_rev | GGG TCA TCA GTG TCT AGG |
| hPIEZO1_for | ATCTCAACCTCTTCCTCTTCC | 57 |
| hPIEZO1_rev | CGGGTATTTCTTCTCTGTCTC |
| hTRPV4_for | GTGACCTACATCATCCTCACCT | 60 |
| hTRPV4_rev | CCTCATCCACCCTGAAGCAC |

**Suppl. table 5:** Used primers with corresponding sequences and annealing temperatures.
